# Supplementary material
Source: PubMed Central journal article supplement (PMC9897509)
Supplement: NIHMS1811745-supplement-1.pdf [file NIHMS1811745-supplement-1.pdf]

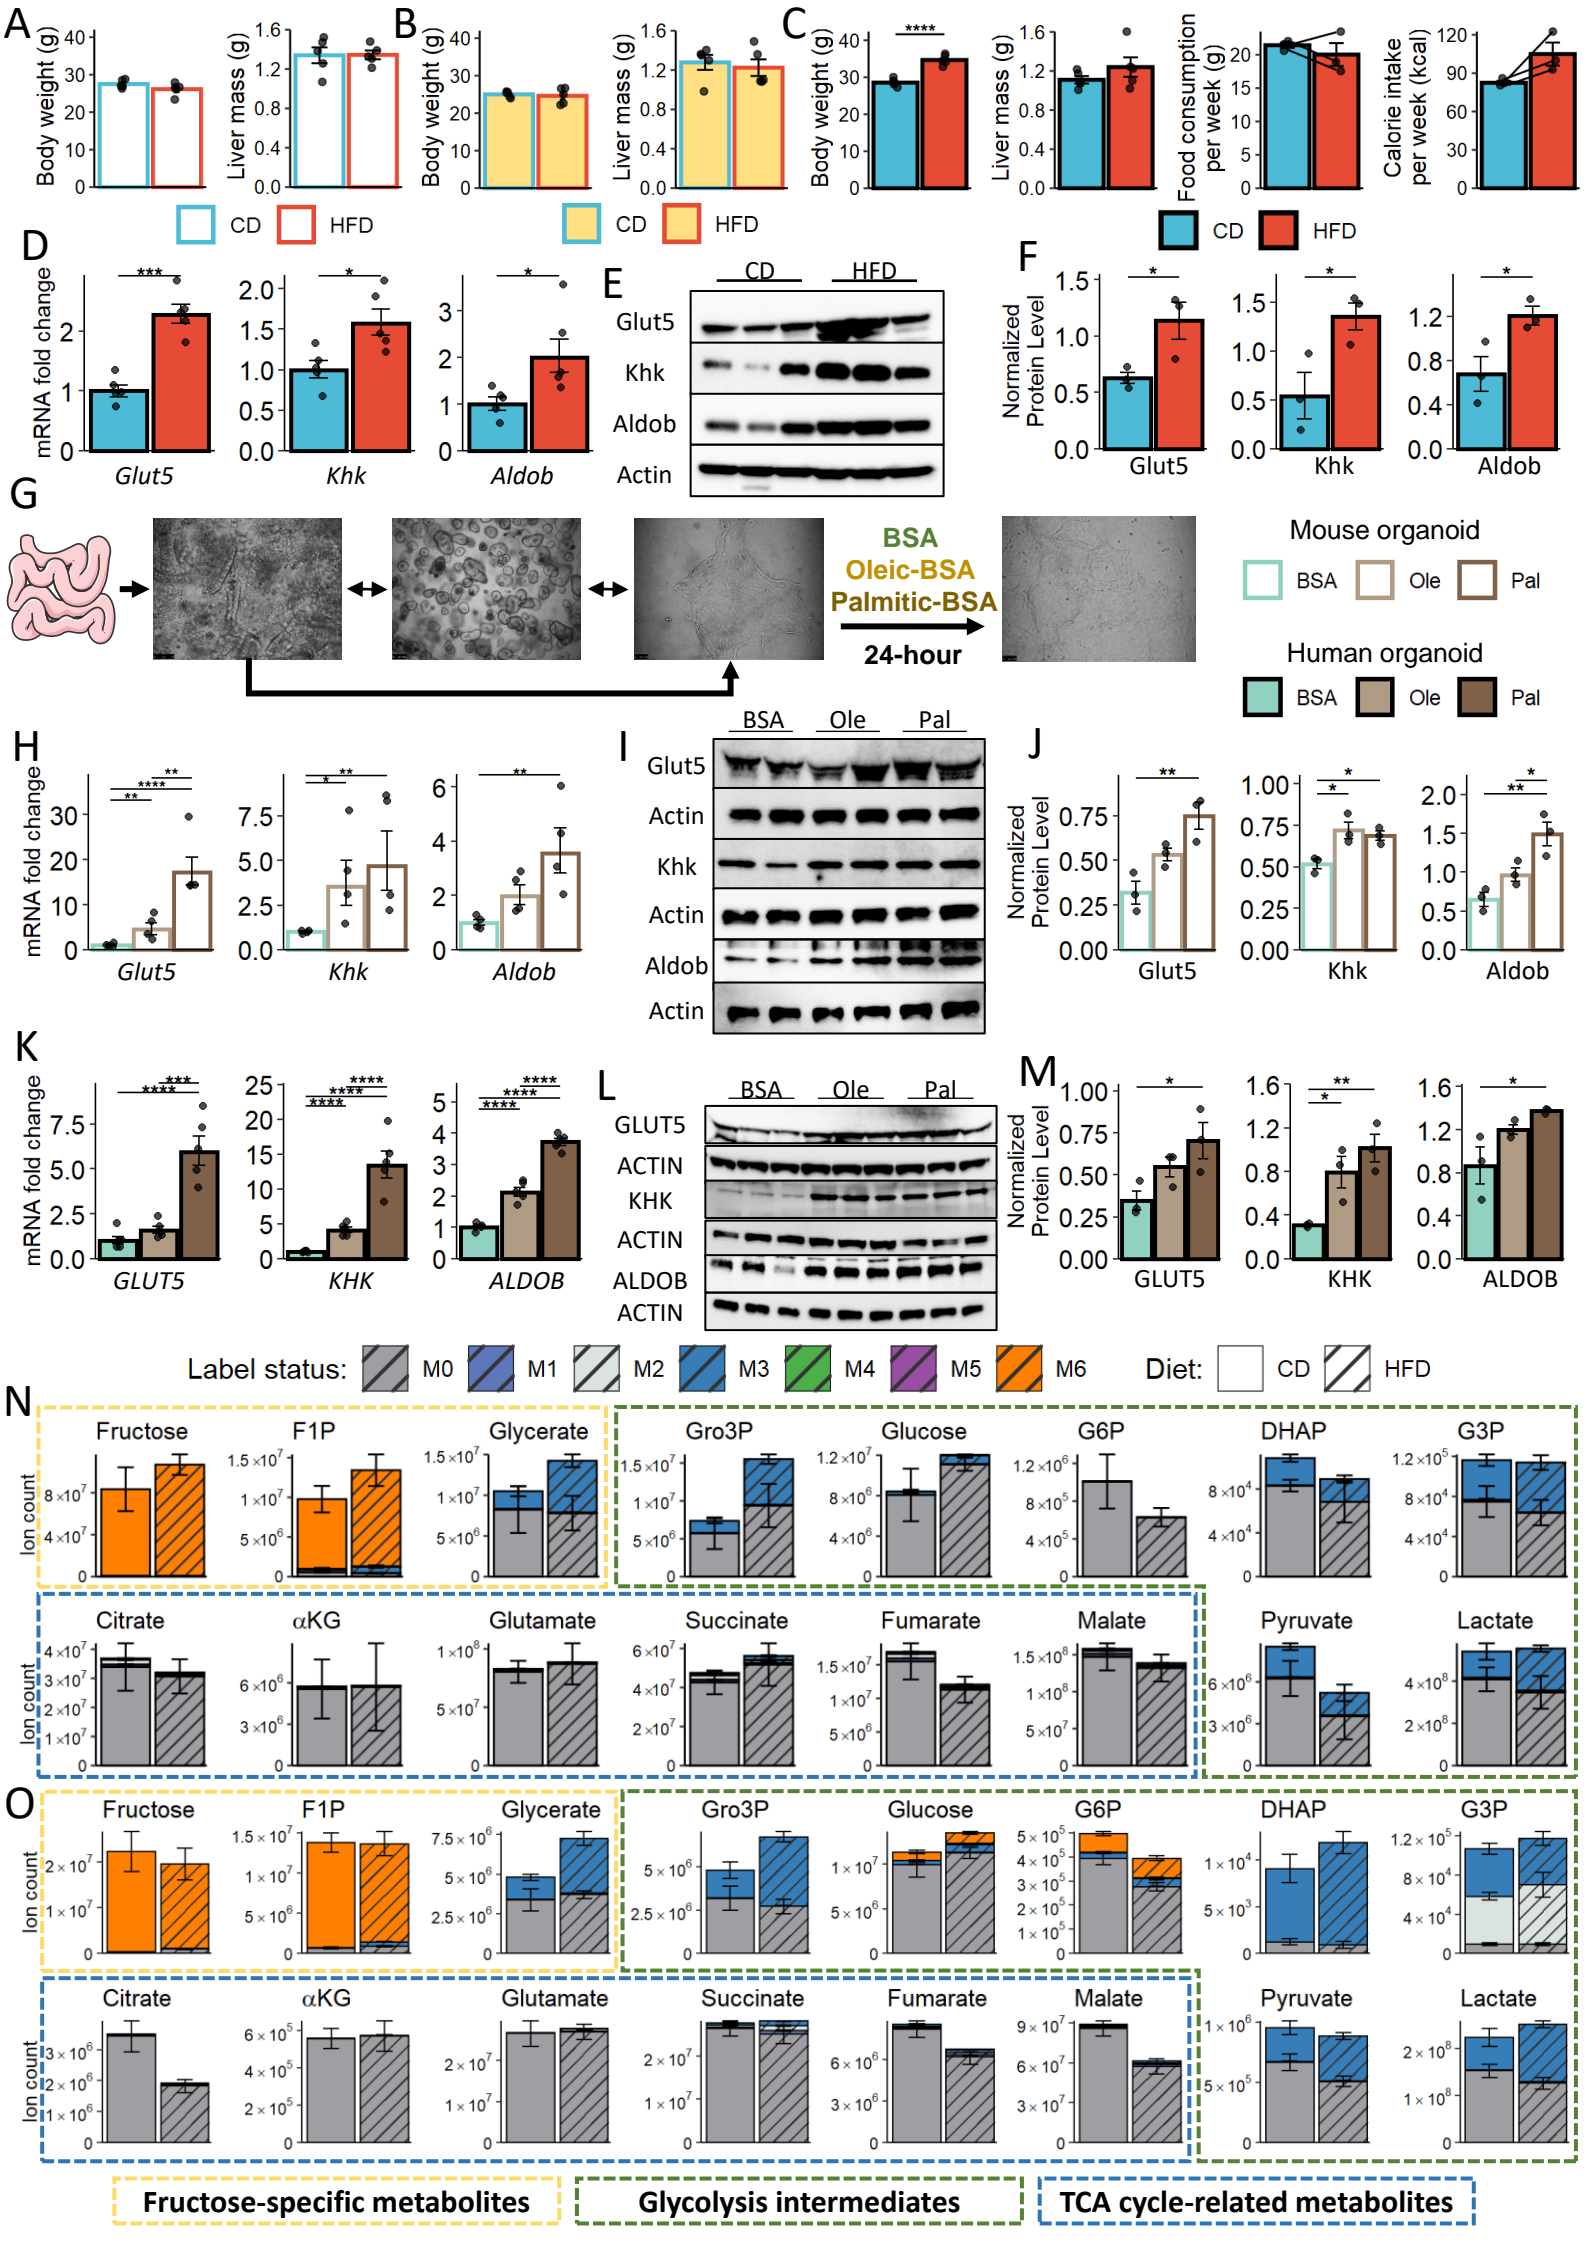

**Figure S1. Effects of HFD on mouse and human intestinal fructose metabolism. Related to Figure 1.**

A - C. Mice body weight and wet liver mass of individual mice during tissue harvest (N = 5) in the special diet feeding experiment for 3 days and 4 weeks.

D. mRNA expression of fructose metabolism genes in the jejunum as quantified by RT-PCR.

E - F. Protein expression of fructose metabolism genes in the jejunum by western blot and the associated quantification (N = 3).

G. Schematic diagram depicting the organoid culture and experimental designs.

H. mRNA expression of fructose metabolism genes in the mouse jejunal organoid as quantified by RT-PCR (N = 4 mice).

I - J. Protein expression of fructose metabolism genes in the mouse jejunal organoid by western blot and the associated quantification (N = 3 mice).

K. mRNA expression of fructose metabolism genes in the human jejunal organoid as quantified by RT-PCR (N = 5 from 2 human donors).

L - M. Protein expression of fructose metabolism genes in the human jejunal organoid by western blot and the associated quantification (N = 3 from 2 human donors).

N. Tracing data (3 days) of fructose metabolism in the jejunum; data are represented in the total ion count.

O. Tracing data (4 weeks) of fructose metabolism in the jejunum; data are represented in the total ion count.

BSA: Bovine serum albumin; Ole: oleic acid; Pal: Palmitic acid; TCA: tricarboxylic acid; F1P: fructose-1-phosphate; Gro3P: Glycerol-3-phosphate; G6P: Glucose-6-phosphate; F6P: fructose-6-phosphate; F1,6P: Fructose-1,6-biphosphate; DHAP: Dihydroxyacetone phosphate; G3P: D-Glyceraldehyde-3-phosphate; Glycerol-3-P: Glycerol-3-phosphate. Data are represented as mean  $\pm$  SEM. T-test was used for comparison between 2 groups and the post hoc Tukey correction was performed after ANOVA was used for comparison more than 2 groups. \*:  $p < 0.05$ , \*\*:  $p < 0.01$ , \*\*\*:  $p < 0.001$ , \*\*\*\*:  $p < 0.0001$ .

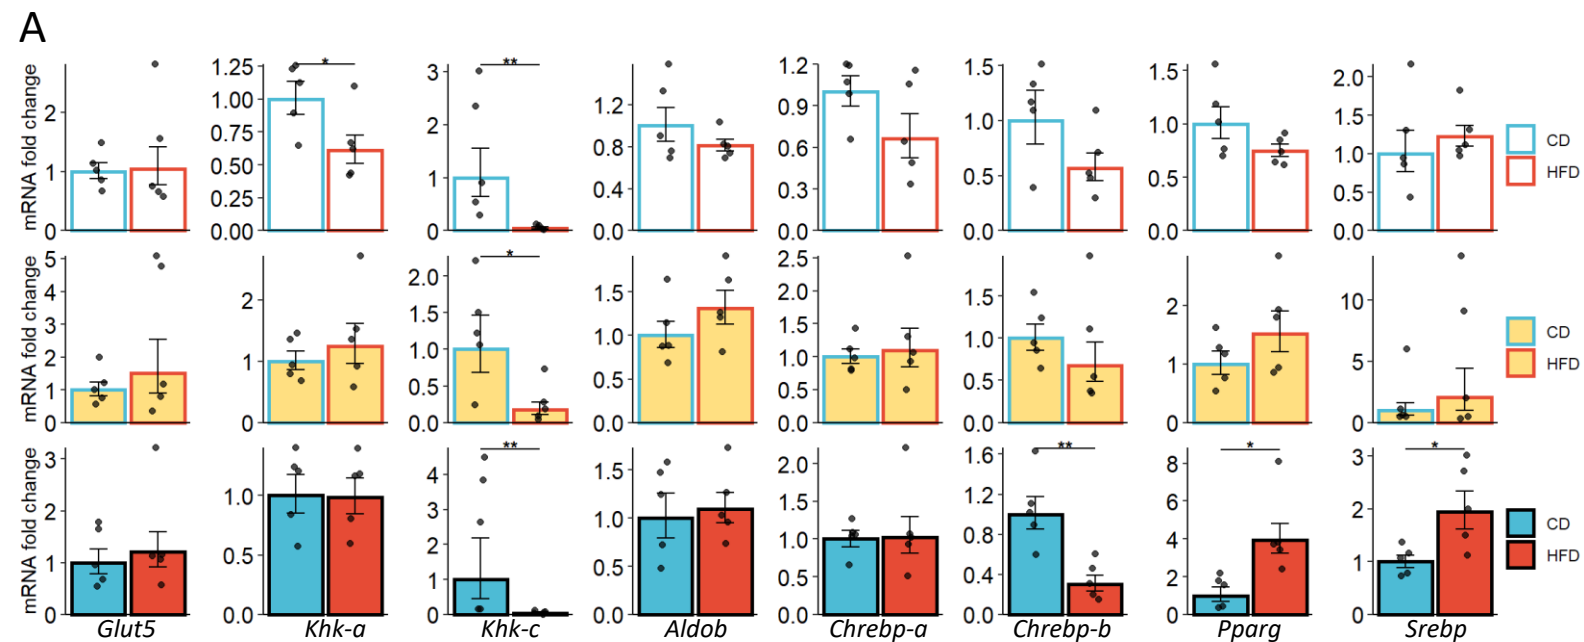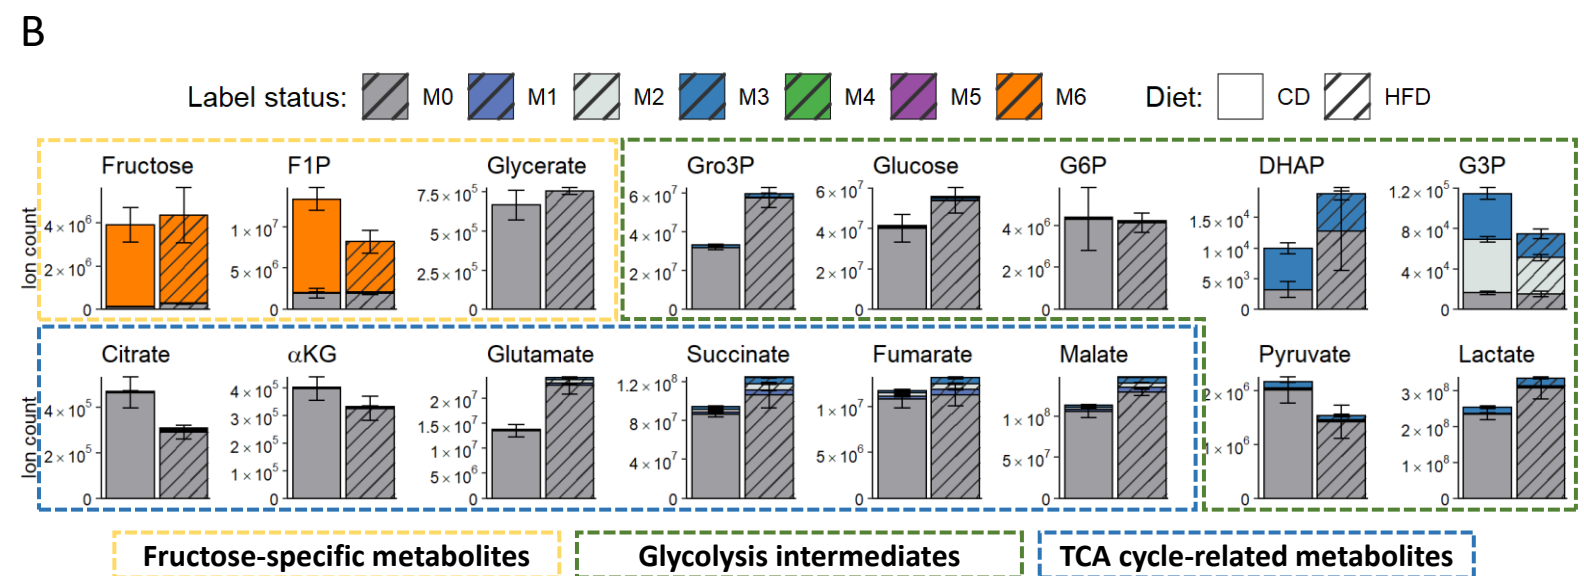

Class: Energy carrier Fructolysis & Glycolysis TCA SEM: 20 4 0.8 0.16 0.032

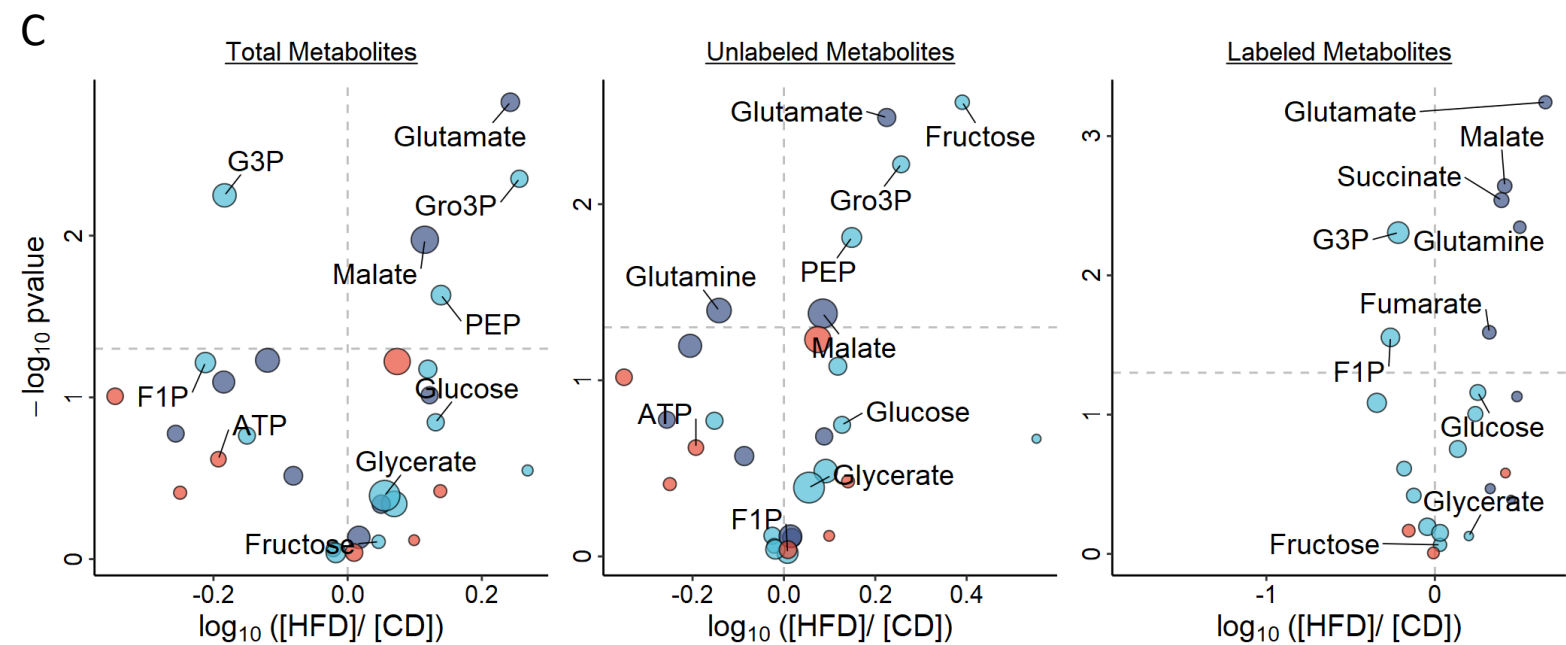

**Figure S2. Effects of HFD on mouse hepatic fructose metabolism. Related to Figure 2.**

A. mRNA expression of sugar and lipid metabolism genes in the liver as quantified by RT-PCR in mice fed on high fat diet (HFD) for 3 days with no fructose gavage (top panel), mice fed on HFD for 3 days, and tissue harvesting 10 minutes after fructose gavage (middle panel), and mice fed on HFD for 4 weeks and tissue harvesting 10 minutes after fructose gavage (bottom panel).

B. Tracing data (4 weeks) of fructose metabolism in the liver; data are represented in the total ion count.

C. Metabolomic data of fructose metabolism in the liver; data are represented in the log-ratio between the HFD and CD groups after mice were fed for 4 weeks.

TCA: tricarboxylic acid; F1P: fructose-1-phosphate; Gro3P: Glycerol-3-phosphate; G6P: Glucose-6-phosphate; F6P: fructose-6-phosphate; F1,6P: Fructose-1,6-biphosphate; DHAP: Dihydroxyacetone phosphate; G3P: D-Glyceraldehyde-3-phosphate; Glycerol-3-P: Glycerol-3-phosphate., Fructose-Bisphosphate B. NAD<sup>+</sup>: nicotinamide adenine dinucleotide; NADP<sup>+</sup>: nicotinamide adenine dinucleotide phosphate; ATP: adenosine triphosphate; GTP: guanosine triphosphate; UTP: uridine triphosphate; SEM: standard error mean. Data are represented as mean  $\pm$  SEM. T-test was used. \*:  $p < 0.05$ , \*\*:  $p < 0.01$ .

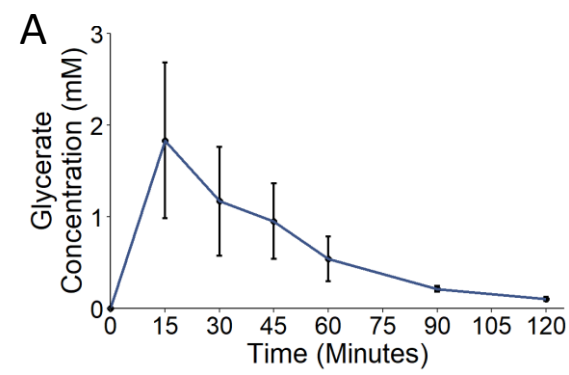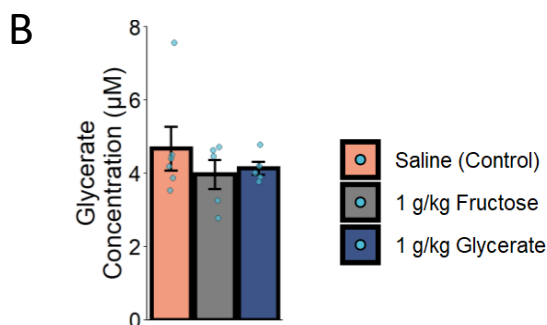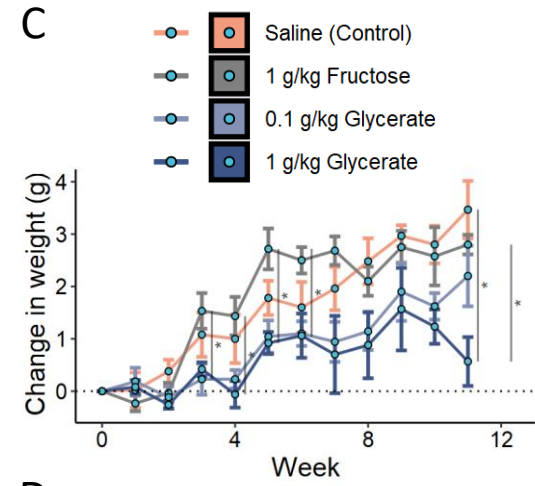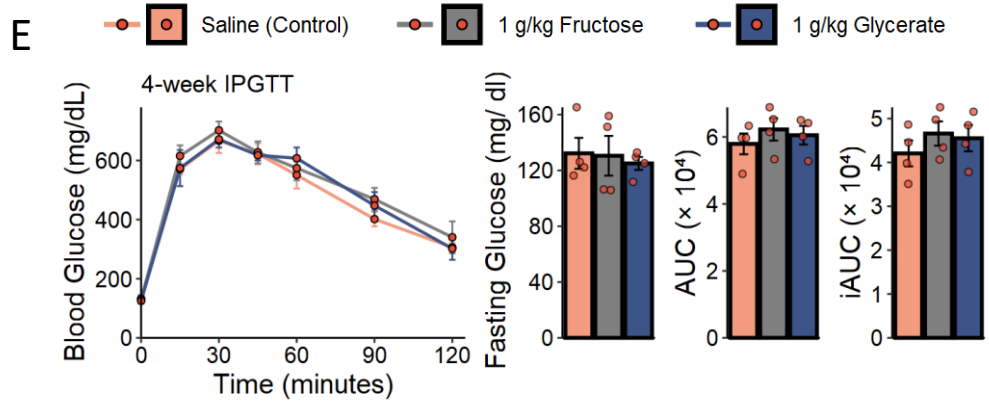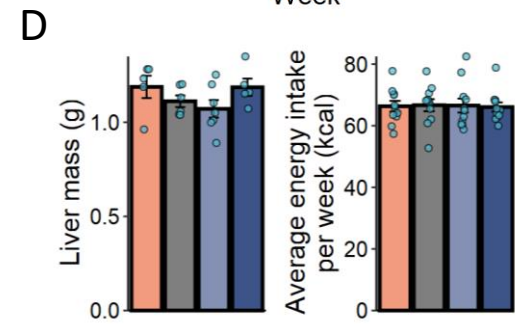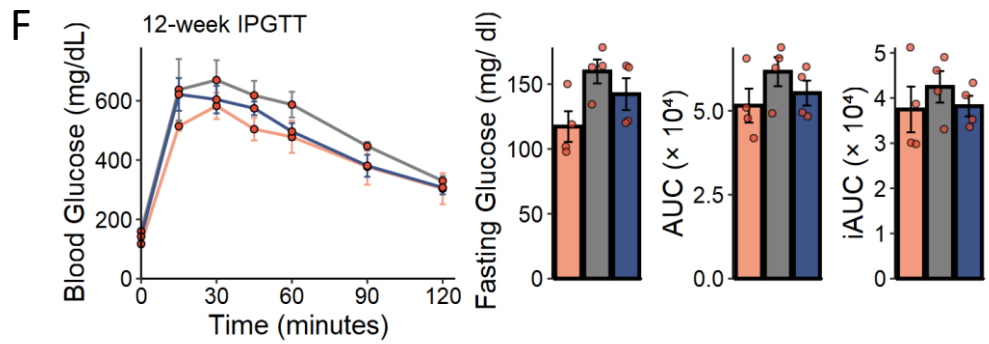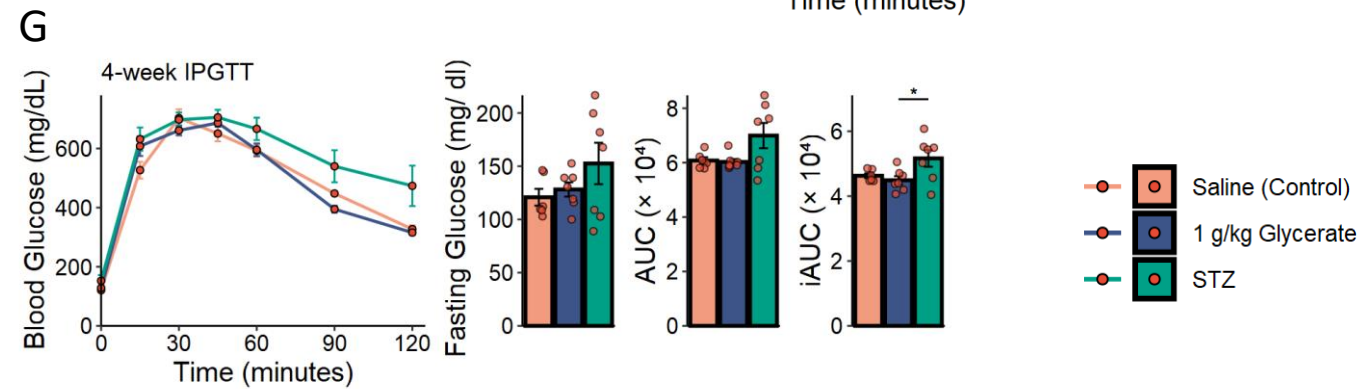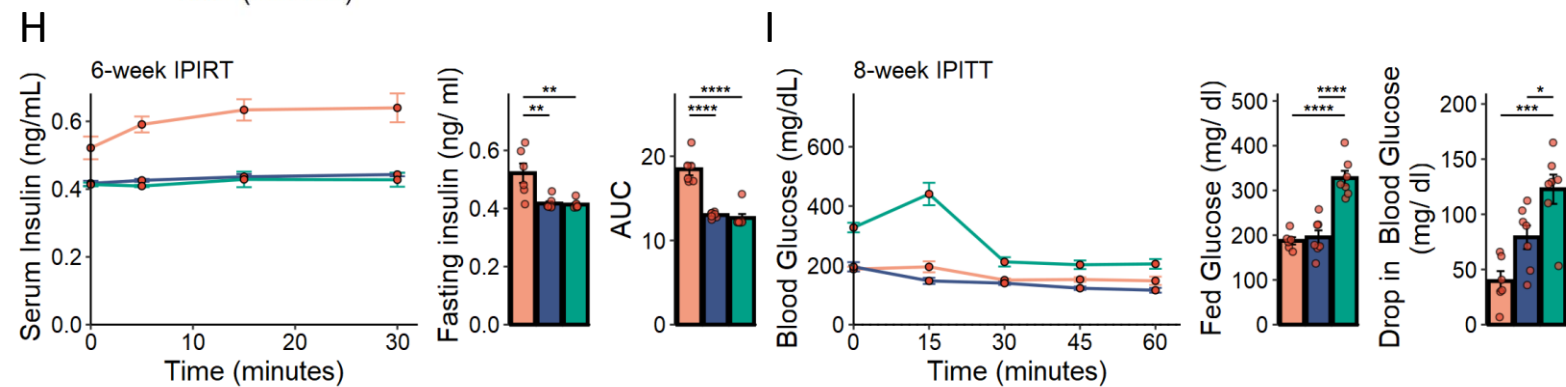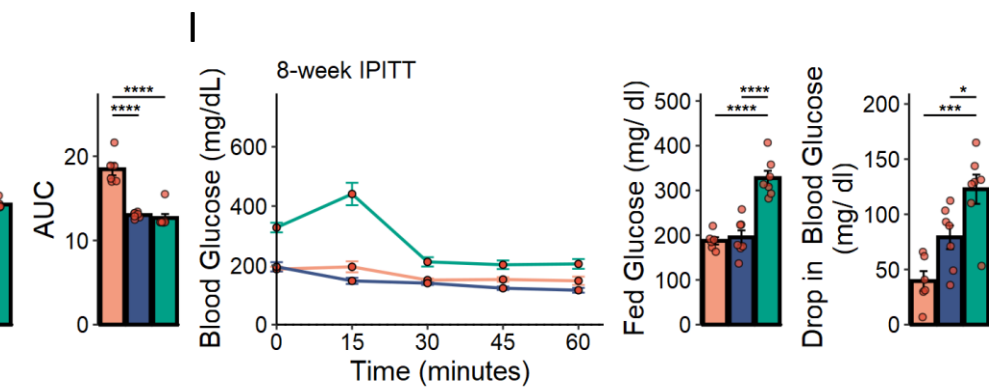

**Figure S3. Effect of elevated glycerate on mouse physiology. Related to Figure 3.**

A. Serum glycerate concentration quantification upon single IP injection of 1 g/kg glycerate (N = 5). Tail vein blood was collected at the specified time-point among treatment-naive mice.

B. Serum glycerate concentration upon nutrient injection at 24-hour (N = 5 – 6). Cardiac blood was collected after treatment for 12 weeks.

C - D. Anthropometric measurement of CD mice on different daily nutrient injection cohort (N = 5 – 6).

E - F. Blood glucose levels, AUC, and iAUC quantification in IPGTT experiments among mice fed on HFD (N = 4).

G. In a separate cohort of mice, blood glucose levels, AUC, and iAUC quantification in IPGTT experiment at 4th week (N = 6 – 7).

H. Serum insulin levels and associated AUC quantification in IPIRT experiment (N = 6 – 7).

I. Blood glucose levels and changes in blood glucose level in IPITT experiment (N = 6 – 7).

Data are represented as mean  $\pm$  SEM. T-test was used for comparison between 2 groups and the post hoc Tukey correction was performed after ANOVA was used for comparison more than 2 groups. \*:  $p < 0.05$ , \*\*:  $p < 0.01$ , \*\*\*:  $p < 0.001$ , \*\*\*\*:  $p < 0.0001$ .



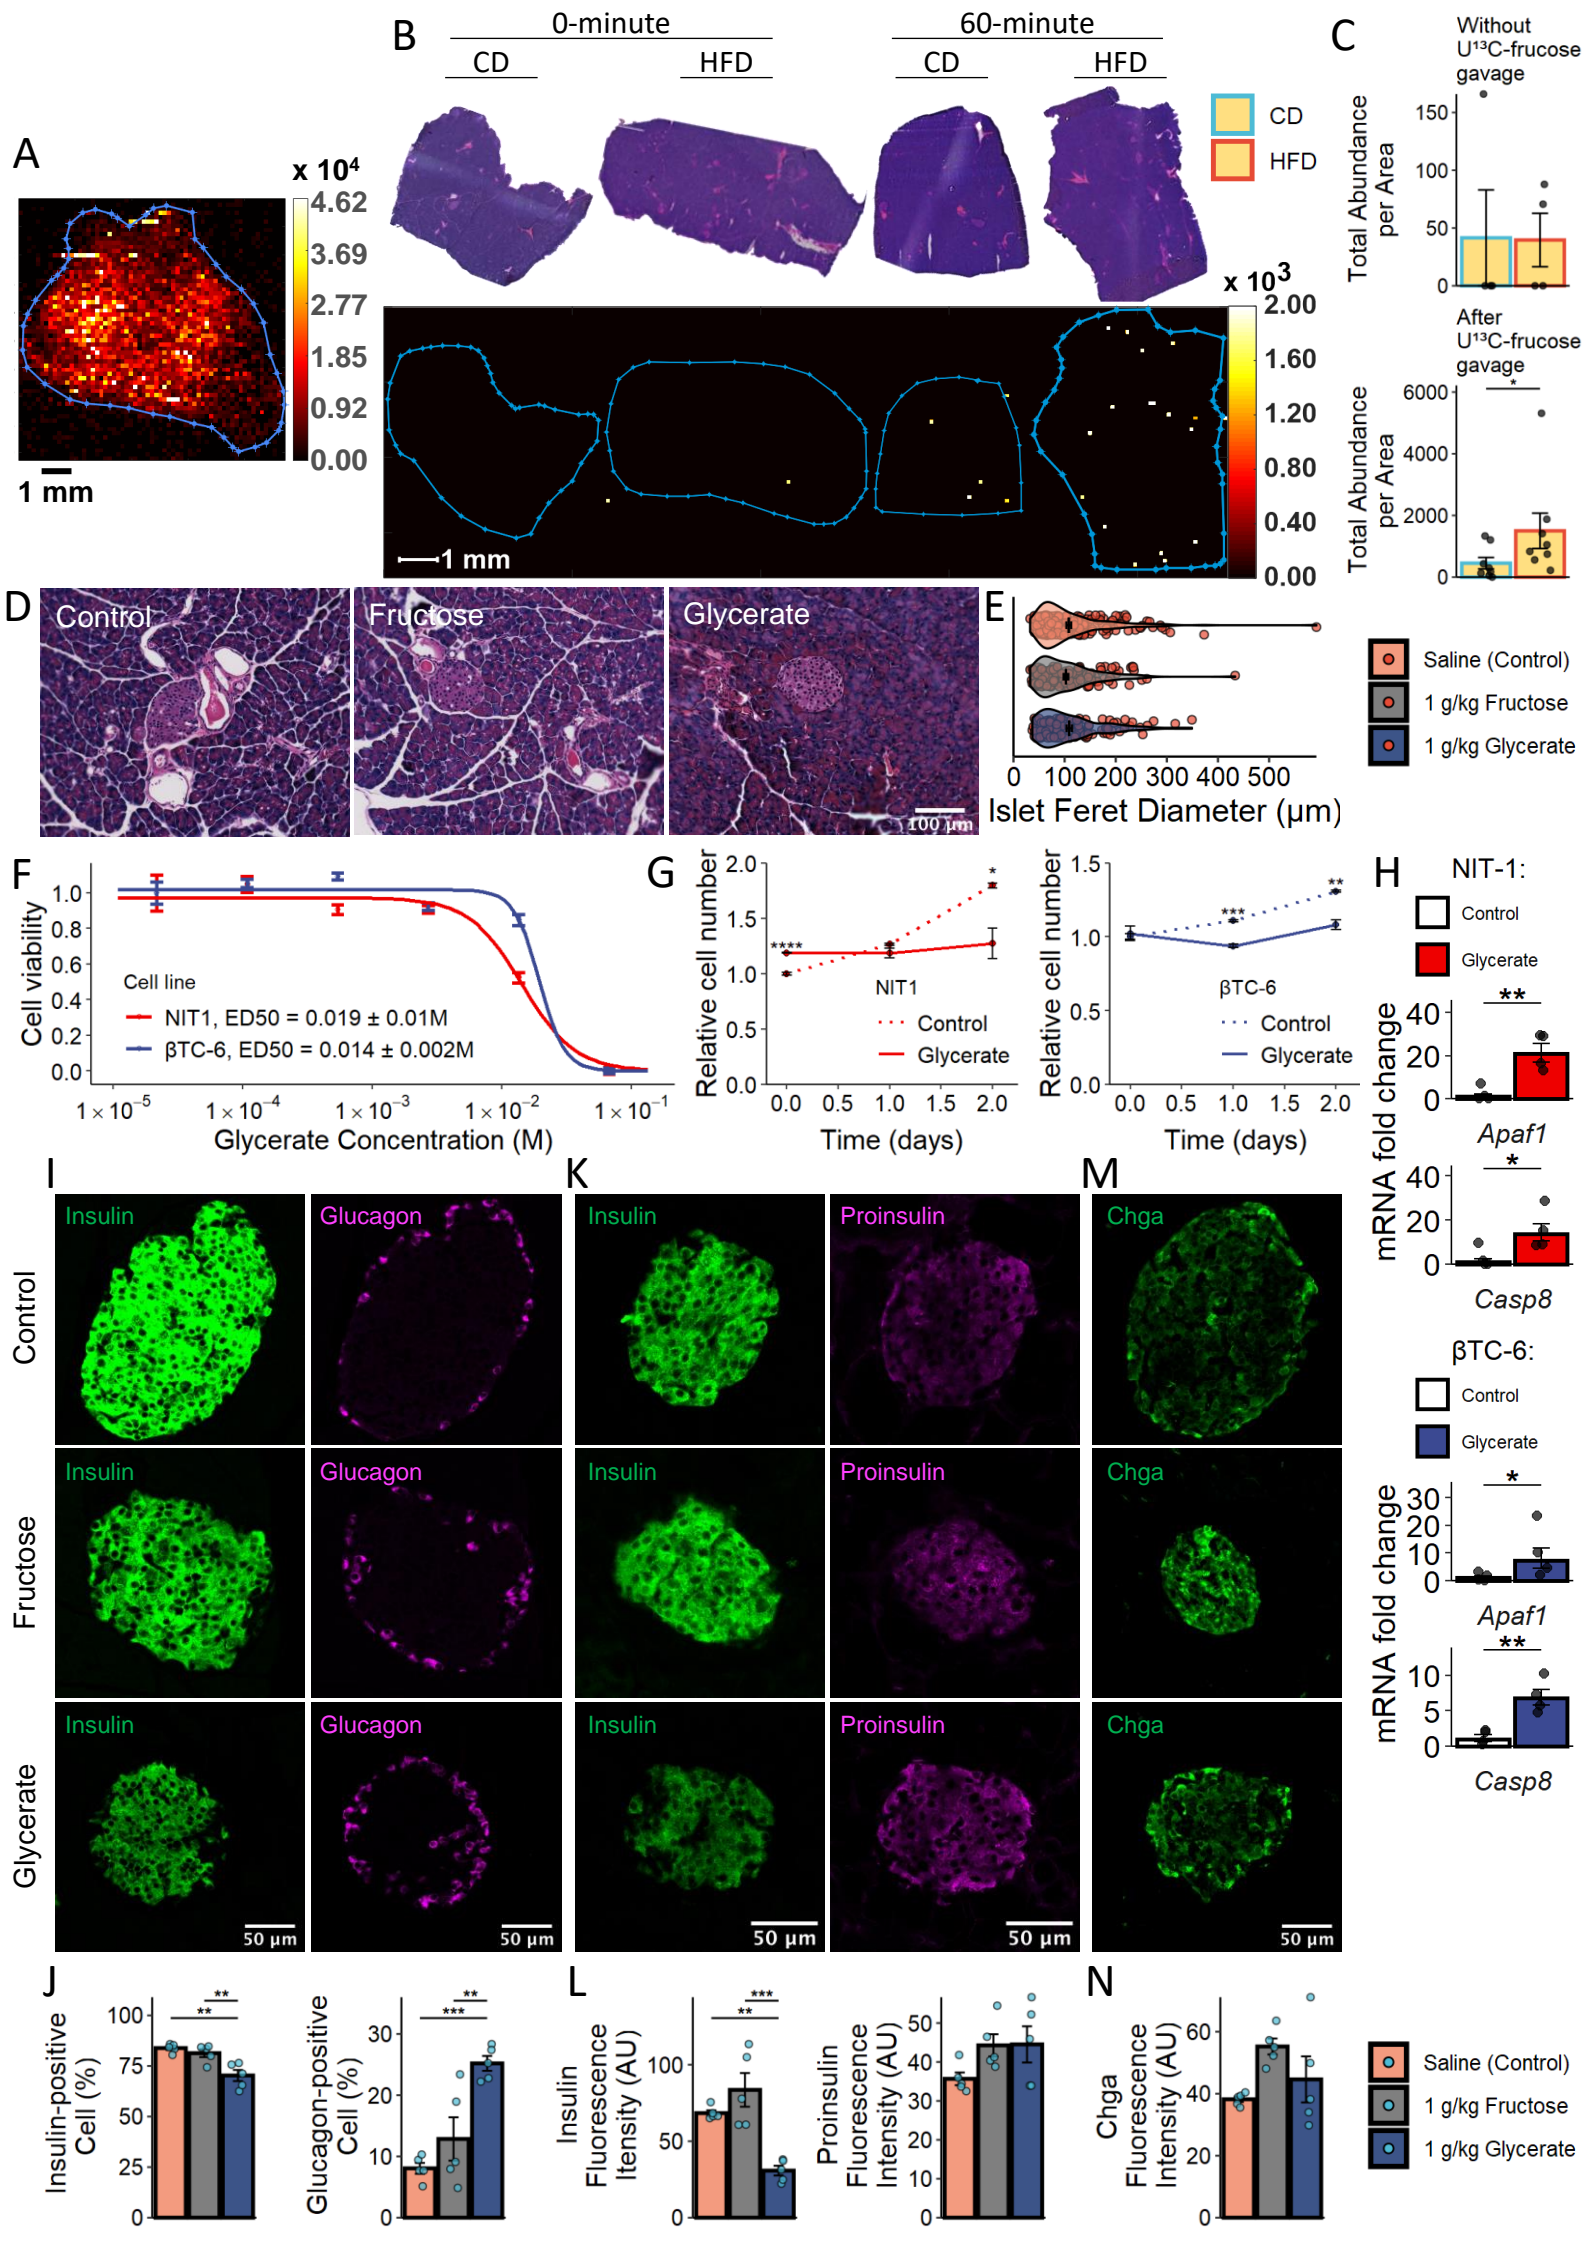

**Figure S4. Effects of in vitro and in vivo exposure to elevated glycerate. Related to Figure 4.**

- A. Representative mass spectrometry imaging of mouse jejunum with U<sup>13</sup>C-fructose gavage. Glycerate were detected at  $m/z = 108.0293 \pm 0.0003$  Th ( $\pm 2.5$  ppm).
- B. Representative mass spectrometry imaging of mouse pancreas with U<sup>13</sup>C-fructose gavage after 3 days of feeding with CD and HFD. Top row: H&E of the tissue section; Bottom row: matched mass spectrometry imaging heatmap. Glycerate were detected at  $m/z = 108.0293 \pm 0.0003$  Th ( $\pm 2.5$  ppm), N = 4 – 8.
- C. Quantification of M+3 glycerate abundance within the pancreatic tissue without U<sup>13</sup>C-fructose gavage and 45 – 60 minutes after U<sup>13</sup>C-fructose gavage. Wilcoxon rank sum test was used to compare the abundance quantification between CD and HFD groups.
- D – E. H&E staining of pancreas and quantification after 12 weeks of control, fructose, or glycerate treatment of mice fed on HFD (Control: 222 islets; Fructose: 162 islets; Glycerate: 134 islets).
- F. Dose-response curve of in vitro treatment of glycerate to  $\beta$ -cell lines,  $\beta$ TC-6 and NIT-1 (N = 4)
- G. Proliferation assay of  $\beta$ -cell lines upon either PBS or 5 mM glycerate treatment. (N = 3 – 5)
- H. mRNA expression of apoptosis-related genes in  $\beta$ -cell lines after either PBS or 5 mM glycerate treatment for 24 hours as quantified by RT-PCR (N = 4). Apaf1: apoptotic peptidase activating factor 1; Casp8: caspase 8.
- I - J. Separate channel of Insulin-Glucagon staining and the quantification of the  $\alpha$ -cell and  $\beta$ -cell.
- K - L. Separate channel of Insulin-Proinsulin staining and the quantification of the insulin and proinsulin fluorescence intensity.
- M - N. Chromogranin A (Chga) staining and the quantification fluorescence intensity.
- N = 5 mice for all staining experiments. Data are represented as mean  $\pm$  SEM. T-test was used for comparison between 2 groups and the post hoc Tukey correction was performed after ANOVA was used for comparison more than 2 groups. \*:  $p < 0.05$ , \*\*:  $p < 0.01$ , \*\*\*:  $p < 0.001$ , \*\*\*\*:  $p < 0.0001$ .



**Table S1. Association between the glycerate kinase mutation and diabetes. Related to Figure 3.**

|                          | Diabetes Mellites |                            |
|--------------------------|-------------------|----------------------------|
|                          | <i>Log Odds</i>   | <i>p-value</i>             |
| (Intercept)              | -3.68             | < 2.00 × 10 <sup>-16</sup> |
| Age                      | 0.0427            | < 2.00 × 10 <sup>-16</sup> |
| Sex (Male)               | 0.484             | < 2.00 × 10 <sup>-16</sup> |
| Ethnicity (Caucasian)    | -0.537            | < 2.00 × 10 <sup>-16</sup> |
| Overweight (BMI >25)     | 0.472             | < 2.00 × 10 <sup>-16</sup> |
| Trunk fat (%)            | 0.0693            | 1.27 × 10 <sup>-10</sup>   |
| Total cholesterol        | -0.925            | < 2.00 × 10 <sup>-16</sup> |
| High density cholesterol | -0.164            | 4.53 × 10 <sup>-4</sup>    |
| Low density cholesterol  | 0.249             | 9.53 × 10 <sup>-7</sup>    |
| Triglycerides            | 0.452             | < 2.00 × 10 <sup>-16</sup> |
| <i>GLYCTK</i> mutations  | 0.458             | 1.17 × 10 <sup>-7</sup>    |

**Table S2. Primers used in the study. Related to STAR Methods.**

| Primer                                                                                       | Source                       |
|----------------------------------------------------------------------------------------------|------------------------------|
| Primer: <i>Glut5</i> Forward for total mouse cDNA: CCAATATGGGTACAACGTAGCTG                   | (Chen et al., 2018)          |
| Primer: <i>Glut5</i> Reverse for total mouse cDNA: GCGTCAAGGTGAAGGACTCAATA                   | (Chen et al., 2018)          |
| Primer: <i>Khk</i> Forward for total mouse cDNA: ATGTGGTGACAAATACCCAGA                       | (Zhao et al., 2020)          |
| Primer: <i>Khk</i> Reverse for total mouse cDNA: CAAGCAAGGAAAGGACAGTGC                       | (Zhao et al., 2020)          |
| Primer: <i>Khk-a</i> Forward for total mouse cDNA: TTGCCGATTTTGTCTGGAT                       | (Diggle et al., 2010)        |
| Primer: <i>Khk-a</i> Reverse for total mouse cDNA: CCTCGGTCTGAAGGACCACAT                     | (Diggle et al., 2010)        |
| Primer: <i>Khk-c</i> Forward for total mouse cDNA: TGGCAGAGCCAGGGAGAT                        | (Diggle et al., 2010)        |
| Primer: <i>Khk-c</i> Reverse for total mouse cDNA: ATCTGGCAGGTTCTGTCTGTA                     | (Diggle et al., 2010)        |
| Primer: <i>Aldob</i> Forward for total mouse cDNA: GAAACCGCCTGCAAAGGATAA                     | (Zhao et al., 2020)          |
| Primer: <i>Aldob</i> Reverse for total mouse cDNA: GAGGGTCTCGTGAAAAGGAT                      | (Zhao et al., 2020)          |
| Primer: <i>Chrebp-a</i> Forward for total mouse cDNA: CGACACTACCCACCTCTTC                    | (Zhao et al., 2020)          |
| Primer: <i>Chrebp-a</i> Reverse for total mouse cDNA: TTGTTACGCCGATCTTGTC                    | (Zhao et al., 2020)          |
| Primer: <i>Chrebp-b</i> Forward for total mouse cDNA: TCTGCAGATCGCGTGGAG                     | (Zhao et al., 2020)          |
| Primer: <i>Chrebp-b</i> Reverse for total mouse cDNA: CTTGTCCCGCATAGCAAC                     | (Zhao et al., 2020)          |
| Primer: <i>Pparg</i> Forward for total mouse cDNA: CGGTTTCAGAAGTGCCTTG                       | (Fujiki et al., 2009)        |
| Primer: <i>Pparg</i> Reverse for total mouse cDNA: GGTTACAGCTGGTGCATATCAC                    | (Fujiki et al., 2009)        |
| Primer: <i>Srebp-1c</i> Forward for total mouse cDNA: GAGCCATGGATTGCACATTT                   | (Rahtu-Korpela et al., 2014) |
| Primer: <i>Srebp-1c</i> Reverse for total mouse cDNA: CTCAGGAGAGTTGGCACCTG                   | (Rahtu-Korpela et al., 2014) |
| Primer: <i>Apaf1</i> Forward for total mouse cDNA: AGTGGCAAGGACACAGATGG                      | (Hauck et al., 2017)         |
| Primer: <i>Apaf1</i> Reverse for total mouse cDNA: GGCTTCCGAGCTAACACA                        | (Hauck et al., 2017)         |
| Primer: <i>Casp8</i> Forward for total mouse cDNA: TGCTTGGACTACATCCCACAC                     | (Hauck et al., 2017)         |
| Primer: <i>Casp8</i> Reverse for total mouse cDNA: TGCAGTCTAGGAAGTTGACCA                     | (Hauck et al., 2017)         |
| Primer: <i>Ins1+2</i> Forward for total mouse cDNA: AGCGTGGCTTCTTCTACACACC                   | (Pujadas et al., 2016)       |
| Primer: <i>Ins1+2</i> Reverse for total mouse cDNA: CCAGCTCCAGTTGTGCCACT                     | (Pujadas et al., 2016)       |
| Primer: <i>Gcg</i> Forward for total mouse cDNA: AGGAATTCATTGCGTGGCTG                        | (Pujadas et al., 2016)       |
| Primer: <i>Gcg</i> Reverse for total mouse cDNA: CAATGGCGACTTCTTCTGGG                        | (Pujadas et al., 2016)       |
| Primer: <i><math>\beta</math>-Actin</i> Forward for total mouse cDNA: GGCTGTATCCCCTCCATCG    | (Chen et al., 2018)          |
| Primer: <i><math>\beta</math>-Actin</i> Reverse for total mouse cDNA: CCAGTTGGTAACAATGCCATGT | (Chen et al., 2018)          |
| Primer: <i>GLUT5</i> Forward for total human cDNA: ACGTTGCTGTGGTCTGTAACC                     | (Weng et al., 2018)          |
| Primer: <i>GLUT5</i> Reverse for total human cDNA: CATTAAAGATCGCAGGCACGATA                   | (Weng et al., 2018)          |
| Primer: <i>KHK</i> Forward for total human cDNA: CTAAGGAGGACTCGGAGATAAAGG                    | (Wang et al., 2020)          |
| Primer: <i>KHK</i> Reverse for total human cDNA: CATTGAGCCCATGAAGGCAC                        | (Wang et al., 2020)          |
| Primer: <i>ALDOB</i> Forward for total human cDNA: GGCAGTCCGAGAAATCCTCT                      | This paper                   |
| Primer: <i>ALDOB</i> Reverse for total human cDNA: CTCCTTGGTCTAACTTGATTCCC                   | This paper                   |
| Primer: <i><math>\beta</math>-ACTIN</i> Forward for total human cDNA: AGAGCTACGAGCTGCCTGAC   | (Weng et al., 2018)          |
| Primer: <i><math>\beta</math>-ACTIN</i> Reverse for total human cDNA: AGCACTGTGTTGGCGTACAG   | (Weng et al., 2018)          |
